# Supplementary material for: Progression of Peripheral Blood Mononuclear Cell Mitochondrial Function during the Early Phase of Sepsis in Intensive Care Unit Patients
Source: Research Square preprint supplement (doi:10.21203/rs.3.rs-7137135/v1), 2025-07-29
Supplement: Supplementary file 1 [file a5c12fad62bcfb07acf0012b.docx]

**Progression of peripheral blood mononuclear cell mitochondrial function during the early phase of sepsis in Intensive Care Unit patients**

**Supplemental Table 1.** An overview of RT-qPCR primers used. 2

**Supplemental File.** Complete exclusion criteria . 3

**Supplemental Table 1.** An overview of RT-qPCR primers used.

| **Gene** |  | **Primer sequence** | **Annealing temperature** °C |
| --- | --- | --- | --- |
| *NDUFB8* | Forward | 5′-TAGGACCCCAGAAGAACGGG-3′ | 58 |
|  | Reverse | 5′-GTAGTCGCCATACCCCATGC-3′ | 58 |
| *SDHB* | Forward | 5′-AAGCTGCAGGACCCATTCTC-3′ | 58 |
|  | Reverse | 5'-CCTGGATTCAGACCCTTAGGAC-3′ | 58 |
| *UQCRC2* | Forward | 5′-ATGTCCAAGCTGCCAAGAAC-3′ | 58 |
|  | Reverse | 5′-CCACTTGCTGCCATTGACTT-3′ | 58 |
| *MTCO2* | Forward | 5′-AGGTCAACGATCCCTCCCTT-3′ | 58 |
|  | Reverse | 5′-GTCGTGTAGCGGTGAAAGTG-3′ | 58 |
| *ATP5F1A* | Forward | 5′-GGGCTATGAAGCAGGTAGCA-3′ | 58 |
|  | Reverse | 5′-TCCCCTTACACCCGCATAGA-3′ | 58 |
| *RPS15* | Forward | 5′-AGAAGCCGGAAGTGGTGAAGAC-3′ | 58 |
|  | Reverse | 5′-AGAGGGATGAAGCGGGAGGAG-3′ | 58 |
| *CSNK2A2* | Forward | 5′-GTGGTTGTAAAAATCCTGAAGCCA-3′ | 58 |
|  | Reverse | 5′-AGCTGGTGTCTTTGACACGG-3′ | 58 |
| *ACTB* | Forward | 5′-AGCACAGAGCCTCGCCTTT-3′ | 58 |
|  | Reverse | 5′-ATCATCATCCATGGTGAGCTGG-3′ | 58 |

**Supplemental File** Complete exclusion criteria

Patients from the sepsis and control groups were excluded from participation in the case of:

- Urosepsis [ICU patients only] (as urosepsis empirically often quickly improves upon antibiotic treatment, patients were thus expected to be discharged from ICU before 3rd measurement could be completed);
- Transfer from another ICU [ICU patients only];
- Serum haemoglobin level <5,5 mmol/L;
- Current hemodialysis or continuous renal replacement therapy;
- An expected survival of less than six months due to pre-existent underlying conditions (e.g., end-stage cancer);
- Treatment with chemo-, immune- and/or radiotherapy within the past 12 months;
- A significant event leading to hospitalisation within the previous six months;
- History of solid organ or bone marrow transplant;
- History of drug abuse;
- Family history of mitochondrial disease(s);
- Treatment with any investigational agent in the previous 12 months;
- Treatment with *systemic* corticosteroids or other immunosuppressive medications for active autoimmune disease involving the lung, heart, liver, small or large intestine, or neuromuscular system within three months prior to ICU admission;
- Pregnancy;
- Diabetes Mellitus type I or II [pre-ICU-admission where applicable];
- COPD GOLD stage III or IV or other severe respiratory disorders (FEV1 <30% and FEV1/FVC < 0.7) [pre-ICU admission where applicable];
- Any stage of acute or chronic renal failure [pre-ICU admission, where applicable];
- Any stage of acute or chronic liver failure [pre-ICU admission, where applicable];
- Consumption of >25 grams of ethanol daily (>2.5 alcoholic beverages/day);
- Not able to understand the Dutch language;
- Current participation in intervention research.
